# Supplementary material for: Ternary TiO₂ Nanocomposite for Enhanced Photocatalytic Degradation of Metronidazole in Pharmaceutical Wastewater
Source: Research Square preprint supplement (doi:10.21203/rs.3.rs-8492490/v1), 2026-01-19
Supplement: Supplementary file 1 [file d21b420d3ad743bffb81e304.docx]

**Supporting information for**

**Ternary TiO₂ Nanocomposite for Enhanced Photocatalytic Degradation of Metronidazole in Pharmaceutical Wastewater.**

Noha I. Abdelaziz1,2, Medhat A. Al-Ghobashy3, Marianne Nebsen3, Ahmed H. Nadim 3

1Postgraduate Program in Analytical Chemistry, Faculty of Pharmacy, Cairo University, Cairo 11562, Egypt

2Department of Chemistry, School of Pharmacy, Newgiza University, Giza 12256, Egypt

3PharmaceuticalAnalytical Chemistry Department, Faculty of Pharmacy, Cairo University, Cairo 11562, Egypt

*Corresponding author email: [ahmed.nagib@cu.edu.eg](mailto:ahmed.nagib@cu.edu.eg)

**Supplementary materials**


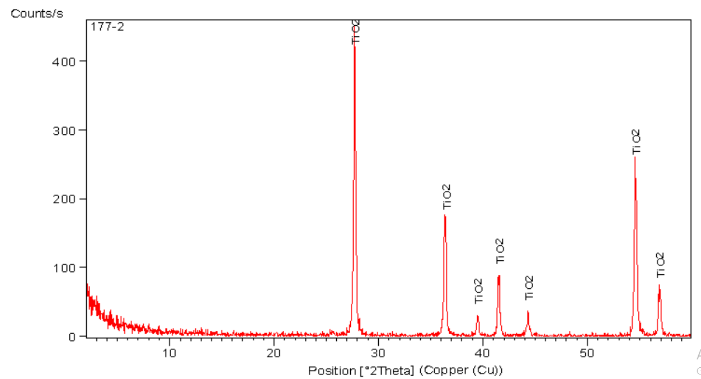

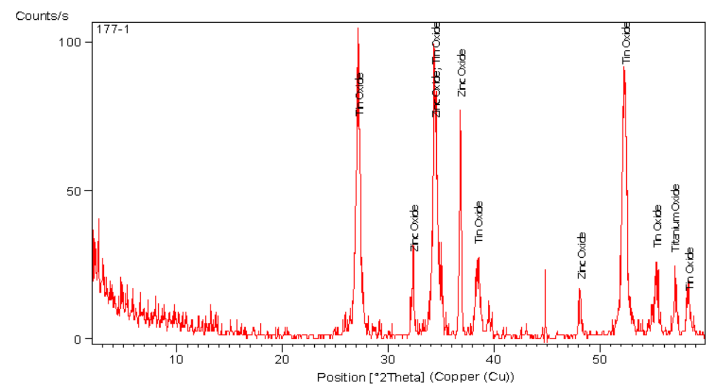


**b**

**a**

Figure 1: XRD Pattern of (a) commercially available pure TiO2 rutile and anatase nanoparticles, and (b) synthesized TiO2/ZnO/SnO2 ternary nanostructures.

Figure 2: XPS Spectra of TiO2/ZnO/SnO2 nanocomposites (a) the survey spectra (b) O 1s (c) Sn 3d (d) Ti 2p (e) Zn 2p


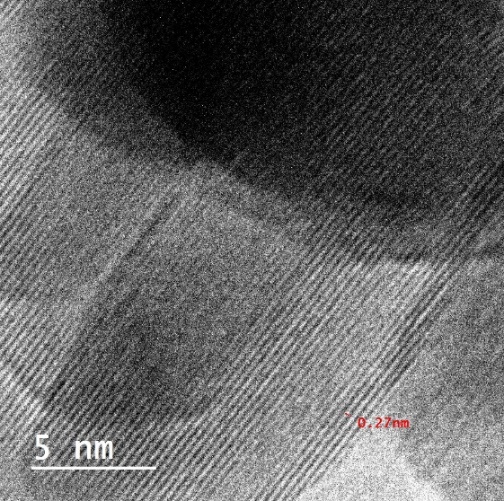

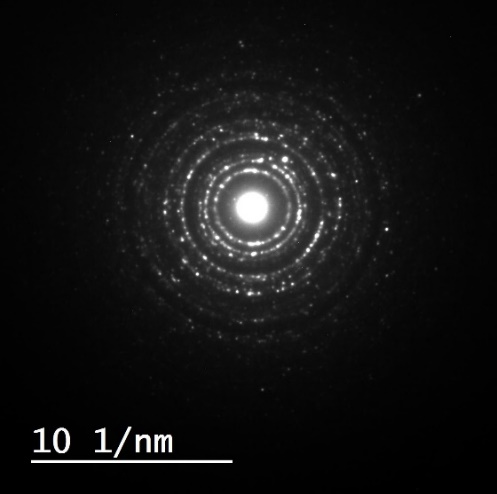


(g)

(h)

Figure 3: TEM image (a,b, and C) of TiO2 readymade nanoparticles and (b,c,d,e,f,g and h) of synthesized TiO2/ZnO/SnO2 at different levels.

Figure 4: SEM images (a, b and c) of the synthesized nanocomposite at different magnifications.

*Table 1. Summary of System Suitability and Validation Parameters for HPLC Analysis of Metronidazole*

| **System Suitability Parameters [[1]](#footnote-1)** |  |
| --- | --- |
| Retention time (min) | 3.82 |
| Theoretical plates (N) | 7650 |
| Tailing factor (T) | 1.12 |
| Capacity factor (k′) | 1.15 |
| Selectivity (α) | 1.28 |
| Resolution (Rs) | 4.87 |
| Height equivalent to theoretical plate (mm) | 0.032 |

| **Validation Parameters** |  |
| --- | --- |
| Linearity range (µg/mL) | 1 – 50 |
| Correlation coefficient (R²) | 0.9999 |
| Regression equation | y = 15.832x + 1.268 |
| LOD (µg/mL)[[2]](#footnote-2) | 0.14 |
| LOQ (µg/mL)[[3]](#footnote-3) | 0.42 |
| Accuracy (mean ± SD) | 99.85 ± 1.02 |
| Repeatability (intra-day RSD %)[[4]](#footnote-4) | 0.56 |
| Intermediate precision (inter-day RSD %)[[5]](#footnote-5) | 1.75 |
| Robustness (% RSD)[[6]](#footnote-6) |  |
| Asymmetric factor (T) | 0.55 |
| Capacity factor (k′) | 1.15 |

Figure 5: (a) HPLC chromatogram of the recovered MNZ using the method stated (b) HPLC chromatogram of the degraded MNZ showing the elution of its degradation products at lower retention time.


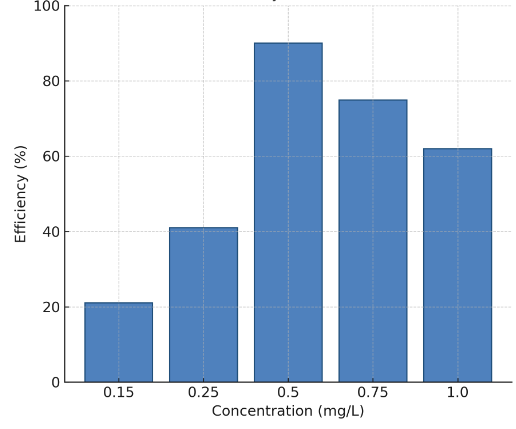


Figure 6. The effect on initial photocatalyst concentration on the degradation of MNZ, showing an optimum activity at 0.5mg/L


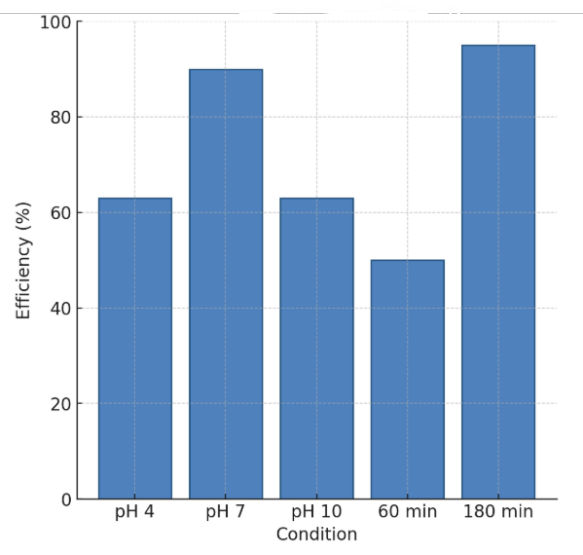


Figure 7. Effect of pH and time on MNZ photocatalytic degradation showing neutral pH 7 at time 120 minutes to be of optimal activity and expected the 180 minutes has improved degradation


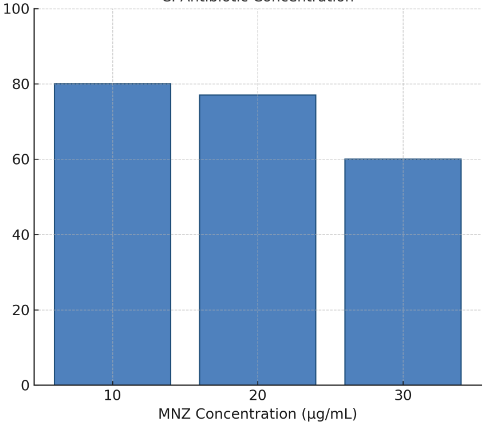


Figure 8. The effect of initial MNZ concentration on the efficiency of the photocatalytic degradation

*Table 2.Comparative performance of the TiO₂/ZnO/SnO₂ nanocomposite with selected TiO₂-based photocatalysts reported in the literature for metronidazole degradation under UV irradiation.*

| Photocatalyst | Light Source | Matrix | % MNZ Removal |
| --- | --- | --- | --- |
| TiO₂/ZnO/SnO₂ synthesized nanocomposite | UV | Pharmaceutical wastewater | 76.17% |
| TiO₂-doped Fe³⁺ (Malakootian et al., 2019b) | UV-C | Pharmaceutical wastewater | 70% |
| TiO₂-P25 and PbS  (Tran et al., 2019) | UV | Aquatic Samples | 95% |
| ZnO–CuO (Zhang et al., 2020) | UV | Hospital wastewater | 80% |
| TiO₂–Graphene (Wang et al., 2019) | UV | Synthetic wastewater | 78% |


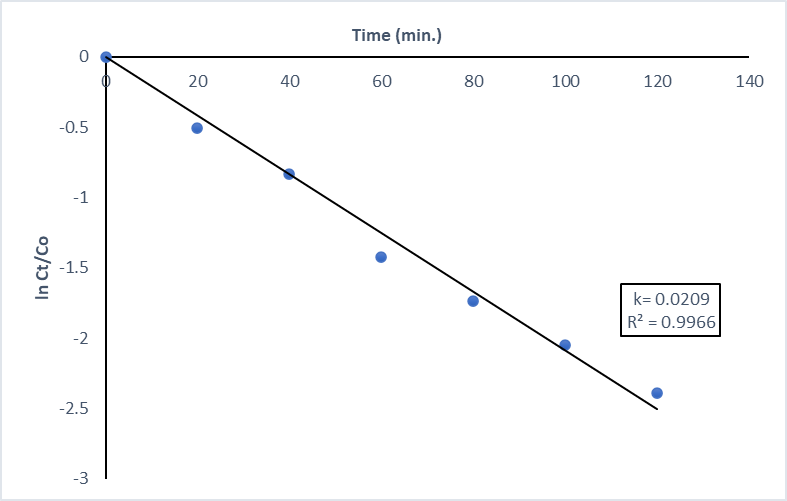


*t1/2* = 36.1 minutes

Figure 9: Kinetic profile of the photodegradation of 250 µg/mL initial MNZ concentration at pH 7 with 0.5 mg/mL of ZnO/SnO2/TiO2 nanocatalyst

1. Reference values for HPLC parameters: k′ ≥ 1, α ≥ 1, Rs ≥ 1.5, T ≤ 2 and N ≥ 2000 [↑](#footnote-ref-1)
2. LOD determined by the formula 3.3 × (SD of the response/slope) [↑](#footnote-ref-2)
3. LOQ determined by the formula 10 × (SD of the response/slope) [↑](#footnote-ref-3)
4. Mean of nine determinations over three concentration levels [↑](#footnote-ref-4)
5. Average of nine determinations with deliberate method parameter variations [↑](#footnote-ref-5)
6. Studied factors: wavelength (±2 nm), flow rate (±0.1 mL/min), and mobile phase pH (±1%) [↑](#footnote-ref-6)
